# Supplementary material for: Character displacement and the evolution of niche complementarity in a model biofilm community
Source: PubMed Central journal article supplement — Evolution. 2015 Jan 19;69(2):283–93. doi: 10.1111/evo.12581 (PMC4335599; doi:10.1111/evo.12581), 2015-01-19
Supplement: evo0069-0283-sd1.pdf [file evo0069-0283-sd1.pdf]

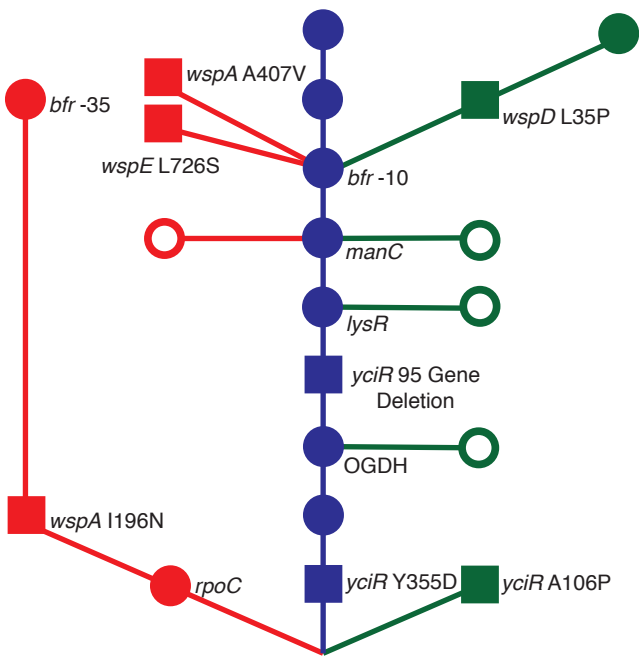

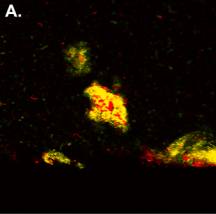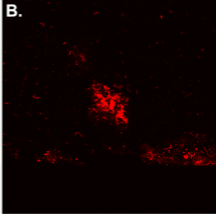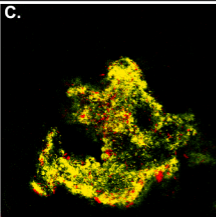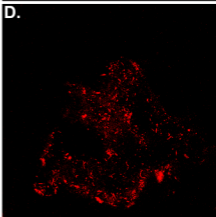

**Supplementary Table 1. Genotypes of evolved ecotypes from the Early (315 generations) and Late (1,050 generations) populations.** Variants were discovered by Illumina sequencing, and were covered by two forward and two reverse reads, with Phred scores greater than 30. Mutations are specific to single clones, which were sequenced to 103-229x coverage and subsequently verified by Sanger sequencing.

| <b>Generation</b> | <b>Ecotype</b> | <b>Locus</b>     | <b>Mutation</b>      | <b>Annotation</b>                                           |
|-------------------|----------------|------------------|----------------------|-------------------------------------------------------------|
| Early             | Studded        | YP_837213        | E481D                | Monooxygenase                                               |
| Early             | Studded        | YP_835154        | R204S                | 2-oxoglutarate dehydrogenase                                |
| Early             | Studded        | YP_834472        | Del 38, del 39, L40V | Transcriptional regulator 5' to lysR                        |
| Early             | Studded        | n/a              | Del, 95 genes        | <i>yciR</i> , and 94 genes downstream (incl. monooxygenase) |
| Early             | Studded        | YP_834525        | Stop @ 263           | <i>manC</i>                                                 |
| Early             | Ruffled        | YP_837186        | A106P                | <i>yciR</i>                                                 |
| Early             | Wrinkly        | YP_837416        | I196N                | <i>wspA</i>                                                 |
| Early             | Wrinkly        | YP_833988        | A1318V               | <i>rpoC</i>                                                 |
| Late              | Shared*        | <b>YP_837213</b> | E481D                | Monooxygenase                                               |
| Late              | Shared*        | <b>YP_835154</b> | R204S                | 2-oxoglutarate dehydrogenase                                |
| Late              | Shared*        | <b>YP_834472</b> | Del 38, del 39, L40V | Transcriptional regulator 5' to lysR                        |

|      |         |                  |                            |                                                             |
|------|---------|------------------|----------------------------|-------------------------------------------------------------|
| Late | Shared* | n/a              | Del, 95 genes              | <i>yciR</i> , and 94 genes downstream (incl. monooxygenase) |
| Late | Shared* | <b>YP_834525</b> | Stop @ 263                 | <i>manC</i>                                                 |
| Late | Shared* | <b>YP_835839</b> | -10 promoter region, G → A | 5' of bacterioferritin                                      |
| Late | Studded | n/a              | Del, 49 genes              | Deletion incl. oxalate decarboxylase (Bcen2424_4588)        |
| Late | Studded | YP_837566        | Synonymous                 | Succinate dehydrogenase                                     |
| Late | Ruffled | YP_834838        | A209P                      | DUF88                                                       |
| Late | Ruffled | YP_834185        | -10 promoter region, G → A | 5' of <i>mltA</i>                                           |
| Late | Ruffled | Bcen2424_1770    | G → C                      | 146 bp 5' of <i>rhIB</i>                                    |
| Late | Ruffled | YP_837420        | L35P                       | <i>wspD</i>                                                 |
| Late | Wrinkly | YP_837416        | A407V                      | <i>wspA</i>                                                 |

\*Shared mutations were identified in the Studded, Ruffled, and Wrinkly clones from the Late population.
